# Supplementary material
Source: PubMed Central journal article supplement (PMC7198662)
Supplement: 12250_2019_179_MOESM1_ESM.pdf [file 12250_2019_179_MOESM1_ESM.pdf]

## Electronic Supplementary Material

### Premature Stop Codon at Residue 101 within HIV-1 Rev Does Not Influence Viral Replication of Clade BC but Severely Reduces Viral Fitness of Clade B

Zheng Wang<sup>1,2</sup>✉, Xiaolin Ji<sup>1,2</sup>, Yanling Hao<sup>1,2</sup>, Kunxue Hong<sup>1,2</sup>, Liying Ma<sup>1,2</sup>, Dan Li<sup>1,2</sup>, Yiming Shao<sup>1,2</sup>✉

1. State Key Laboratory of Infectious Diseases Prevention and Control, Collaborative Innovation Center for Diagnosis and Treatment of Infectious Diseases, Chinese Center for Disease Control and Prevention, Beijing 102206, China

2. Division of Research of Virology and Immunology, National Center for AIDS/STD Control and Prevention, Chinese Center for Disease Control and Prevention, Beijing 102206, China

Supporting information to DOI: 10.1007/s12250-019-00179-0

| A               |                                                                    | gp41 |  |  |  |  |  |  |  |  |  |
|-----------------|--------------------------------------------------------------------|------|--|--|--|--|--|--|--|--|--|
| B WT Rev        | 832 GGG TGG GAA GCC CTC AAA TAT TGG 855<br>278 G W E A L K Y W 285 |      |  |  |  |  |  |  |  |  |  |
| B Rev Q101Stop  | 832 GGG TGG GAA GCC CTT AAA TAT TGG 855<br>278 G W E A L K Y W 285 |      |  |  |  |  |  |  |  |  |  |
| B               |                                                                    | gp41 |  |  |  |  |  |  |  |  |  |
| BC WT Rev       | 838 GGG TGG GAA GCC CTT AAA TAT CTG 862<br>285 G W E A L K Y L 292 |      |  |  |  |  |  |  |  |  |  |
| BC Rev Stop101Q | 838 GGG TGG GAA GCC CTC AAA TAT CTG 862<br>285 G W E A L K Y L 292 |      |  |  |  |  |  |  |  |  |  |

Fig. S1 Alignment of DNA and amino-acid sequences at residue 282 within gp41 TM region between wild-type virus and mutated virus. The red character indicates the mutated base. (A) clade B virus; (B) clade BC virus.

Table S1. Primers sequences used in the experiment

| Name              | Sequence (5' –3')             |
|-------------------|-------------------------------|
| BC-Stop101Q -F    | GGTGGGAAGCCCTCAAATATCTGG      |
| BC-Stop101 Q-R    | CCAGATATTTGAGGGCTTCCCACC      |
| BC-E117Stop -F    | CTGGAGCTGAAAAGTAGTGCTATTAG    |
| BC-E117Stop-R     | CTAATAGCACTACTTTTCAGCTCCAG    |
| B-BH10-Q101Stop-F | GGGTGGGAAGCCCTTAAATATTGGTGGAA |
| B-BH10-Q101Stop-R | TTCCACCAATATTTAAGGGCTTCCCACCC |
| BC-ClaI-F         | AGCTTAATCGATCTGTAGAAATTG      |
| BC-BamHI-R        | TTGCCCCGGATCCTTATTGTAACGCTGC  |
| B-BmtI-F          | CAGATAGCTAGCAAATTAAGAG        |
| B-HpaI-R          | GAGCAAGTTAACAGCACTATTC        |
